# Supplementary material for: Midlife Life’s Simple 7, Psychosocial Health, and Physical Frailty, Hospital Frailty, and Comprehensive Frailty 10 Years Later
Source: MDPI journal article supplement (doi:10.3390/nu15102412), 2023-05-22
Supplement: s1 [file s1]

## Supplementary Materials

**Table S1:** UK biobank fields used in the construction of the Life's Simple 7 score

**Table S2:** Definition of individual components of the Life's Simple 7 score in the UK Biobank

**Table S3:** Definition and UK Biobank fields of the psychosocial health status factors

**Table S4:** The five frailty criteria for construction of the physical frailty phenotype

**Table S5:** The frailty items and scoring for construction of the frailty index

**Table S6:** The ICD-10 codes and assigned weights used to construct the Hospital Frailty Risk Score

**Table S7:** Baseline characteristics of Hospital Frailty Risk Score

**Table S1.** UK biobank fields used in the construction of the Life's Simple 7 score

| <b>Life's Simple 7 item</b> | <b>UKB fields used</b>                                                                                                 |
|-----------------------------|------------------------------------------------------------------------------------------------------------------------|
| Smoking status              | 20116                                                                                                                  |
| BMI                         | 21001                                                                                                                  |
| Physical activity           | 884, 904                                                                                                               |
| Diet                        | 1309, 1319, 1289, 1299, 1448, 1438, 1468, 1458, 1329, 1339, 1408, 1418, 1428, 2654, 1349, 1359, 1369, 1379, 1389, 3680 |
| Blood pressure              | 4080, 4079                                                                                                             |
| Cholesterol levels          | 30780                                                                                                                  |
| Glycemic status (HbA1C)     | 30750                                                                                                                  |

**Table S2.** Definition of individual components of the Life's Simple 7 score in the UK Biobank

| Life's Simple 7<br>score          | Lifestyle scale |                           |                                                     |       | Biometric scale                                                            |                                                 |                                       |
|-----------------------------------|-----------------|---------------------------|-----------------------------------------------------|-------|----------------------------------------------------------------------------|-------------------------------------------------|---------------------------------------|
|                                   | Smoking status  | BMI                       | Physical activity                                   | Diet* | Blood pressure                                                             | Cholesterol levels                              | Glycemic status                       |
| <b>Optimal<br/>(score=2)</b>      | Never smoked    | <25 kg/m <sup>2</sup>     | >4 days/week of moderate/vigorous physical activity | >7    | SBP<120 mm Hg and DBP< 80 mm Hg untreated                                  | LDL-C <130 mg/dl                                | HbA1c <5.7%                           |
| <b>Intermediate<br/>(score=1)</b> | Former smoker   | 25-29.9 kg/m <sup>2</sup> | ≤4 days/week of moderate/vigorous physical activity | 4-7   | SBP 120-139 or DBP 80-89 mm Hg OR SBP <120 mm Hg and DBP <80 mm Hg treated | LDL-C 130-159 mg/dl OR LDL-C <130 mg/dl treated | HbA1c 5.7-6.4% OR HbA1c <5.7% treated |
| <b>Poor<br/>(score=0)</b>         | Current smoker  | ≥ 30kg/m <sup>2</sup>     | No moderate/vigorous physical activity              | <4    | SBP ≥140 mm Hg or DBP ≥ 90 mm Hg                                           | LDL-C ≥ 160 mg/dl                               | HbA1c ≥ 6.4%                          |

\*Healthy diet score according to Mozaffarian<sup>38</sup> and Said<sup>39</sup> et al.; higher scores indicate adherence to a healthier diet for prevention of cardiovascular disease. BMI, body mass index; SBP, systolic blood pressure; DBP, diastolic blood pressure; LDL-C, low-density lipoprotein cholesterol; HbA1c, glycated hemoglobin.

**Table S3.** Definition and UK Biobank fields of the psychosocial health status factors

| <b>Psychosocial health factors</b> | <b>Touchscreen questionnaire</b>                                                                                                                  | <b>UKB fields used</b> | <b>Judgment</b>                                                    |
|------------------------------------|---------------------------------------------------------------------------------------------------------------------------------------------------|------------------------|--------------------------------------------------------------------|
| <b>Social isolation</b>            | (i) “Including yourself, how many people are living together in your household?” <b>(1 point if living alone)</b>                                 | 709                    |                                                                    |
|                                    | (ii) “How often do you visit friends or family or have them visit you?” <b>(1 point if friends/ family visits less than once a month)</b>         | 1031                   | <b>No</b> (composite score <2);<br><b>Yes</b> (composite score ≥2) |
|                                    | (iii) “Which of the following [leisure/social activities] do you engage in once a week or more often?” <b>(1 point if no activities selected)</b> | 6160                   |                                                                    |
| <b>Loneliness</b>                  | “Do you often feel lonely?”                                                                                                                       | 2020                   | <b>No; Yes</b>                                                     |

**Table S4.** The five frailty criteria for construction of the physical frailty phenotype

| Item                  | UKB fields | Question/Description                            | Score                                                                                                                                                                                                                                                   |
|-----------------------|------------|-------------------------------------------------|---------------------------------------------------------------------------------------------------------------------------------------------------------------------------------------------------------------------------------------------------------|
| Weight loss           | 2306       | Weight change compared with 1 year ago          | Yes, lost weight=1; other=0                                                                                                                                                                                                                             |
| Exhaustion            | 2080       | Frequency of tiredness/lethargy in last weeks   | More than half the days or nearly every day=1; other=0                                                                                                                                                                                                  |
| Slow walking speed    | 924        | Usual walking pace                              | Slow=1; other=0                                                                                                                                                                                                                                         |
| Low physical activity | 6164       | Types of physical activity in last 4 weeks      | None or light activity with a frequency of once per week or less=1;                                                                                                                                                                                     |
|                       | 2624       | Frequency of heavy DIY in last 4 weeks          | medium or heavy activity, or light activity more than once per week=0                                                                                                                                                                                   |
|                       | 1011       | Frequency of light DIY in last 4 weeks          |                                                                                                                                                                                                                                                         |
|                       | 3637       | Frequency of other exercises in last 4 weeks    |                                                                                                                                                                                                                                                         |
|                       | 991        | Frequency of strenuous sports in last 4 weeks   |                                                                                                                                                                                                                                                         |
|                       | 971        | Frequency of walking for pleasure in last weeks |                                                                                                                                                                                                                                                         |
| Low grip strength     | 46         | Hand grip strength(left)                        | sex and BMI adjusted cutoffs:<br>Men:<br>≤29 kg for BMI ≤24;<br>≤30 kg for BMI 24.1-26;<br>≤30 kg for BMI 26.1-28;<br>≤32 kg for BMI >28<br>Women:<br>≤17 kg for BMI ≤23;<br>≤17.3 kg for BMI 23.1-26;<br>≤18 kg for BMI 26.1-29;<br>≤21 kg for BMI >29 |
|                       | 47         | hand grip strength (right)                      |                                                                                                                                                                                                                                                         |
|                       | 31         | sex                                             |                                                                                                                                                                                                                                                         |
|                       | 21001      | BMI                                             |                                                                                                                                                                                                                                                         |

Table adapted from Fried<sup>40</sup> and Hanlon<sup>16</sup>, et al. BMI, body mass index.

**Table S5.** The frailty items and scoring for construction of the frailty index

| Type of deficit   | ID | Item                                                       | UKB Fields               | Score                                                                   |
|-------------------|----|------------------------------------------------------------|--------------------------|-------------------------------------------------------------------------|
| Cancer            | 1  | Any cancer diagnosis*                                      | 134, 2453                | No=0; Yes=1                                                             |
|                   | 2  | Multiple cancers diagnosed                                 | 134                      | No/single=0; Multiple cancer=1                                          |
| Sensory           | 3  | Glaucoma*                                                  | 20002 (1277), 6148, 2227 | No=0; Yes=1                                                             |
|                   | 4  | Cataracts                                                  | 20002 (1278), 6148, 2227 | No=0; Yes=1                                                             |
|                   | 5  | Hearing difficulty                                         | 2247                     | No=0; Yes/completely deaf=1                                             |
| Cranial           | 6  | Migraine*                                                  | 20002 (1265), 2473       | No=0; Yes=1                                                             |
|                   | 7  | Mouth/teeth dental problems                                | 6149                     | None=0; Any=1                                                           |
| Mental wellbeing¶ | 8  | Fatigue: frequency of tiredness/lethargy in last two weeks | 2080                     | Not at all=0; Several days=0.25; More than half=0.5; Nearly every day=1 |
|                   | 9  | Self-rated health                                          | 2178                     | Excellent=0; Good=0.25; Fair=0.5; Poor=1                                |
|                   | 10 | Sleep: experience of sleeplessness/insomnia                | 1200                     | Never/rarely=0; Sometimes=0.5; Usually=1                                |
|                   | 11 | Depressed feelings: frequency in last two weeks            | 2050                     | Not at all=0; Several days=0.25; More than half=0.5; Nearly every day=1 |
|                   | 12 | Self-described nervous personality                         | 1970                     | No=0; Yes=1                                                             |
|                   | 13 | Severe anxiety/ panic attacks*                             | 20002 (1287), 2473       | No=0; Yes=1                                                             |
|                   | 14 | Sense of misery                                            | 1930                     | No=0; Yes=1                                                             |
| Infirmary         | 15 | Infirmary: long-standing illness or disability             | 2188                     | No=0; Yes=1                                                             |
|                   | 16 | Falls in last year                                         | 2296                     | No falls=0; One fall=0.5; More than one=1                               |
|                   | 17 | Fractures/broken bones in last five years                  | 2463                     | No=0; Yes=1                                                             |
| Respiratory       | 18 | Breathing: wheeze in last year                             | 2316                     | No=0; Yes=1                                                             |
|                   | 19 | Pneumonia*                                                 | 20002 (1398), 2473       | No=0; Yes=1                                                             |
|                   | 20 | Chronic bronchitis/ emphysema*                             | 20002 (1113), 6152       | No=0; Yes=1                                                             |
|                   | 21 | Asthma*                                                    | 20002 (1111), 6152       | No=0; Yes=1                                                             |
| Pain              | 22 | Chest pain                                                 | 2335                     | No=0; Yes=1                                                             |

|                  |    |                                        |                          |             |
|------------------|----|----------------------------------------|--------------------------|-------------|
|                  | 23 | Whole-body pain                        | 6159                     | No=0; Yes=1 |
|                  | 24 | Hip pain                               | 6159                     | No=0; Yes=1 |
|                  | 25 | Back pain                              | 6159                     | No=0; Yes=1 |
|                  | 26 | Stomach/abdominal pain                 | 6159                     | No=0; Yes=1 |
|                  | 27 | Knee pain                              | 6159                     | No=0; Yes=1 |
|                  | 28 | Facial pain                            | 6159                     | No=0; Yes=1 |
|                  | 29 | Head and/or neck pain                  | 6159                     | No=0; Yes=1 |
|                  | 30 | Sciatica*                              | 20002 (1476), 2473       | No=0; Yes=1 |
| Cardiometabolic  | 31 | Diabetes*                              | 20002 (1220,1223), 2443  | No=0; Yes=1 |
|                  | 32 | Myocardial infarction*                 | 20002 (1075), 6150       | No=0; Yes=1 |
|                  | 33 | Angina*                                | 20002 (1074), 6150       | No=0; Yes=1 |
|                  | 34 | Stroke*                                | 20002 (1081,1583), 6150  | No=0; Yes=1 |
|                  | 35 | High blood pressure*                   | 20002 (1065), 6150       | No=0; Yes=1 |
|                  | 36 | Hypothyroidism*                        | 20002 (1226), 2473       | No=0; Yes=1 |
|                  | 37 | Deep-vein thrombosis*                  | 20002 (1094), 6152       | No=0; Yes=1 |
|                  | 38 | High cholesterol*                      | 20002 (1473), 6153, 6177 | No=0; Yes=1 |
| Musculoskeletal  | 39 | Rheumatoid arthritis*                  | 20002 (1464), 2473       | No=0; Yes=1 |
|                  | 40 | Osteoarthritis*                        | 20002 (1465), 2473       | No=0; Yes=1 |
|                  | 41 | Gout*                                  | 20002 (1466), 2473       | No=0; Yes=1 |
|                  | 42 | Osteoporosis*                          | 20002 (1309), 2473       | No=0; Yes=1 |
| Immunological    | 43 | Hay fever/allergic rhinitis or eczema* | 20002 (1387/1452), 6152  | No=0; Yes=1 |
|                  | 44 | Psoriasis*                             | 20002 (1453), 2473       | No=0; Yes=1 |
| Gastrointestinal | 45 | Gastric reflux*                        | 20002 (1138), 2473       | No=0; Yes=1 |
|                  | 46 | Hiatus hernia*                         | 20002 (1474), 2473       | No=0; Yes=1 |
|                  | 47 | Gall stones*                           | 20002 (1162), 2473       | No=0; Yes=1 |
|                  | 48 | Diverticulitis*                        | 20002 (1458), 2473       | No=0; Yes=1 |

\* Participants reported medically diagnosed conditions for these items. Variables included in frailty index from Williams<sup>18</sup> et al. ¶ We excluded loneliness item because it is also a variable in psychosocial health factors. For items with multiple corresponding data fields, we first coded “Yes” and “No” responses using the self-report items and, including for data field 2473. Additional “Yes” responses were then ascertained from the nurse led interview diagnostic codes (data field 20002). Individuals with missing data for both data fields 2473 and 20002 were coded as missing data. Other criteria regarding the definition of items were shown in Mutz<sup>20</sup>, et al.

**Table S6.** The ICD-10 codes and assigned weights used to construct the Hospital Frailty Risk Score

| Num | ICD-10<br>code | Description                                                                                        | Weight |
|-----|----------------|----------------------------------------------------------------------------------------------------|--------|
| 1   | F00            | Dementia in Alzheimer's disease                                                                    | 7.1    |
| 2   | G81            | Hemiplegia                                                                                         | 4.4    |
| 3   | G30            | Alzheimer's disease                                                                                | 4.0    |
| 4   | I69            | Sequelae of cerebrovascular disease (secondary codes)                                              | 3.7    |
| 5   | R29            | Other symptoms and signs involving the nervous and musculoskeletal systems (R29.6Tendency to fall) | 3.6    |
| 6   | N39            | Other disorders of urinary system (includes urinary tract infection and urinary in continence)     | 3.2    |
| 7   | F05            | Delirium, not induced by alcohol and other psychoactive substances                                 | 3.2    |
| 8   | W19            | Unspecified fall                                                                                   | 3.2    |
| 9   | S00            | Superficial injury of head                                                                         | 3.2    |
| 10  | R31            | Unspecified hematuria                                                                              | 3.0    |
| 11  | B96            | Other bacterial agents as the cause of diseases classified to other chapters (secondary code)      | 2.9    |
| 12  | R41            | Other symptoms and signs involving cognitive functions and awareness                               | 2.7    |
| 13  | R26            | Abnormalities of gait and mobility                                                                 | 2.6    |
| 14  | I67            | Other cerebrovascular diseases                                                                     | 2.6    |
| 15  | R56            | Convulsions, not elsewhere classified                                                              | 2.6    |
| 16  | R40            | Somnolence, stupor and coma                                                                        | 2.5    |
| 17  | T83            | Complications of genitourinary prosthetic devices, implants and grafts                             | 2.4    |
| 18  | S06            | Intracranial injury                                                                                | 2.4    |
| 19  | S42            | Fracture of shoulder and upper arm                                                                 | 2.3    |
| 20  | E87            | Other disorders of fluid, electrolyte and acid- base balance                                       | 2.3    |
| 21  | M25            | Other joint disorders, not elsewhere classified                                                    | 2.3    |
| 22  | E86            | Volume depletion                                                                                   | 2.3    |
| 23  | R54            | Senility                                                                                           | 2.2    |
| 24  | Z50            | Care involving use of rehabilitation procedures                                                    | 2.1    |
| 25  | F03            | Unspecified dementia                                                                               | 2.1    |
| 26  | W18            | Other fall on same level                                                                           | 2.1    |
| 27  | Z75            | Problems related to medical facilities and other health care                                       | 2.0    |
| 28  | F01            | Vascular dementia                                                                                  | 2.0    |
| 29  | S80            | Superficial injury of lower leg                                                                    | 2.0    |
| 30  | L03            | Cellulitis                                                                                         | 2.0    |
| 31  | H54            | Blindness and low vision                                                                           | 1.9    |
| 32  | E53            | Deficiency of other B group vitamins                                                               | 1.9    |
| 33  | Z60            | Problems related to social environment                                                             | 1.8    |
| 34  | G20            | Parkinson's disease                                                                                | 1.8    |
| 35  | R55            | Syncope and collapse                                                                               | 1.8    |
| 36  | S22            | Fracture of rib(s), sternum and thoracic spine                                                     | 1.8    |
| 37  | K59            | Other functional intestinal disorders                                                              | 1.8    |
| 38  | N17            | Acute renal failure                                                                                | 1.8    |



|    |     |                                                                                        |     |
|----|-----|----------------------------------------------------------------------------------------|-----|
| 39 | L89 | Decubitus ulcer                                                                        | 1.7 |
| 40 | Z22 | Carrier of infectious disease                                                          | 1.7 |
| 41 | B95 | Streptococcus and staphylococcus as the cause of diseases classified to other chapters | 1.7 |
| 42 | L97 | Ulcer of lower limb, not elsewhere classified                                          | 1.6 |
| 43 | R44 | Other symptoms and signs involving general sensations and perceptions                  | 1.6 |
| 44 | K26 | Duodenal ulcer                                                                         | 1.6 |
| 45 | I95 | Hypotension                                                                            | 1.6 |
| 46 | N19 | Unspecified renal failure                                                              | 1.6 |
| 47 | A41 | Other septicemia                                                                       | 1.6 |
| 48 | Z87 | Personal history of other diseases and conditions                                      | 1.5 |
| 49 | J96 | Respiratory failure, not elsewhere classified                                          | 1.5 |
| 50 | X59 | Exposure to unspecified factor                                                         | 1.5 |
| 51 | M19 | Other arthrosis                                                                        | 1.5 |
| 52 | G40 | Epilepsy                                                                               | 1.5 |
| 53 | M81 | Osteoporosis without pathological fracture                                             | 1.4 |
| 54 | S72 | Fracture of femur                                                                      | 1.4 |
| 55 | S32 | Fracture of lumbar spine and pelvis                                                    | 1.4 |
| 56 | E16 | Other disorders of pancreatic internal secretion                                       | 1.4 |
| 57 | R94 | Abnormal results of function studies                                                   | 1.4 |
| 58 | N18 | Chronic renal failure                                                                  | 1.4 |
| 59 | R33 | Retention of urine                                                                     | 1.3 |
| 60 | R69 | Unknown and unspecified causes of morbidity                                            | 1.3 |
| 61 | N28 | Other disorders of kidney and ureter, not elsewhere classified                         | 1.3 |
| 62 | R32 | Unspecified urinary incontinence                                                       | 1.2 |
| 63 | G31 | Other degenerative diseases of nervous system, not elsewhere classified                | 1.2 |
| 64 | Y95 | Nosocomial condition                                                                   | 1.2 |
| 65 | S09 | Other and unspecified injuries of head                                                 | 1.2 |
| 66 | R45 | Symptoms and signs involving emotional state                                           | 1.2 |
| 67 | G45 | Transient cerebral ischemic attacks and related syndromes                              | 1.2 |
| 68 | Z74 | Problems related to care-provider dependency                                           | 1.1 |
| 69 | M79 | Other soft tissue disorders, not elsewhere classified                                  | 1.1 |
| 70 | W06 | Fall involving bed                                                                     | 1.1 |
| 71 | S01 | Open wound of head                                                                     | 1.1 |
| 72 | A04 | Other bacterial intestinal infections                                                  | 1.1 |
| 73 | A09 | Diarrhea and gastroenteritis of presumed infectious origin                             | 1.1 |
| 74 | J18 | Pneumonia, organism unspecified                                                        | 1.1 |
| 75 | J69 | Pneumonitis due to solids and liquids                                                  | 1.0 |
| 76 | R47 | Speech disturbances, not elsewhere classified                                          | 1.0 |
| 77 | E55 | Vitamin D deficiency                                                                   | 1.0 |
| 78 | Z93 | Artificial opening status                                                              | 1.0 |
| 79 | R02 | Gangrene, not elsewhere classified                                                     | 1.0 |
| 80 | R63 | Symptoms and signs concerning food and fluid intake                                    | 0.9 |
| 81 | H91 | Other hearing loss                                                                     | 0.9 |

|     |     |                                                                           |     |
|-----|-----|---------------------------------------------------------------------------|-----|
| 82  | W10 | Fall on and from stairs and steps                                         | 0.9 |
| 83  | W01 | Fall on same level from slipping, tripping and stumbling                  | 0.9 |
| 84  | E05 | Thyrotoxicosis [hyperthyroidism]                                          | 0.9 |
| 85  | M41 | Scoliosis                                                                 | 0.9 |
| 86  | R13 | Dysphagia                                                                 | 0.8 |
| 87  | Z99 | Dependence on enabling machines and devices                               | 0.8 |
| 88  | U80 | Agent resistant to penicillin and related antibiotics                     | 0.8 |
| 89  | M80 | Osteoporosis with pathological fracture                                   | 0.8 |
| 90  | K92 | Other diseases of digestive system                                        | 0.8 |
| 91  | I63 | Cerebral Infarction                                                       | 0.8 |
| 92  | N20 | Calculus of kidney and ureter                                             | 0.7 |
| 93  | F10 | Mental and behavioral disorders due to use of alcohol                     | 0.7 |
| 94  | Y84 | Other medical procedures as the cause of abnormal reaction of the patient | 0.7 |
| 95  | R00 | Abnormalities of heartbeat                                                | 0.7 |
| 96  | J22 | Unspecified acute lower respiratory infection                             | 0.7 |
| 97  | Z73 | Problems related to life-management difficulty                            | 0.6 |
| 98  | R79 | Other abnormal findings of blood chemistry                                | 0.6 |
| 99  | Z91 | Personal history of risk-factors, not elsewhere classified                | 0.5 |
| 100 | S51 | Open wound of forearm                                                     | 0.5 |
| 101 | F32 | Depressive episode                                                        | 0.5 |
| 102 | M48 | Spinal stenosis (secondary code only)                                     | 0.5 |
| 103 | E83 | Disorders of mineral metabolism                                           | 0.4 |
| 104 | M15 | Polyarthritis                                                             | 0.4 |
| 105 | D64 | Other anemias                                                             | 0.4 |
| 106 | L08 | Other local infections of skin and subcutaneous tissue                    | 0.4 |
| 107 | R11 | Nausea and vomiting                                                       | 0.3 |
| 108 | K52 | Other noninfective gastroenteritis and colitis                            | 0.3 |
| 109 | R50 | Fever of unknown origin                                                   | 0.1 |

---

ICD-10, International Statistical Classification of Diseases and Related Health Problems, Tenth Revision

**Table S7.** Baseline characteristics of Hospital Frailty Risk Score, *n* (%)

| Characteristics                    | N          | LS7 score      |                    |                 | <i>P</i> * | Psychosocial health |                |            |
|------------------------------------|------------|----------------|--------------------|-----------------|------------|---------------------|----------------|------------|
|                                    |            | Poor (0-5)     | Intermediate (6-9) | Optimal (10-14) |            | Good                | Poor           | <i>P</i> * |
| <b>No. of participants</b>         | 366,570    | 36,847         | 250,141            | 79,582          |            | 355,721             | 10,849         |            |
| <b>Age (years), Mean±SD</b>        | 69.34±8.09 | 71.00±7.40     | 70.11±7.88         | 66.17±8.21      | <0.001     | 69.36±8.09          | 68.85±7.95     | <0.001     |
| <b>Sex</b>                         |            |                |                    |                 | <0.001     |                     |                | <0.001     |
| <Male                              | 168,188    | 21,102 (57.27) | 120,434 (48.15)    | 26,652 (33.49)  |            | 163,385 (45.93)     | 4803 (44.27)   |            |
| Female                             | 198,382    | 15,745 (42.73) | 129,707 (51.85)    | 52,930 (66.51)  |            | 192,336 (54.07)     | 6046 (55.73)   |            |
| <b>Race/ethnicity</b>              |            |                |                    |                 | <0.001     |                     |                | <0.001     |
| White                              | 350,085    | 35,150 (95.39) | 239,120 (95.59)    | 75,815 (95.27)  |            | 340,001 (95.58)     | 10,084 (92.95) |            |
| Non-white                          | 16,485     | 1697 (4.61)    | 11,021 (4.41)      | 3767 (4.73)     |            | 15,720 (4.42)       | 765 (7.05)     |            |
| <b>Education level (years)</b>     |            |                |                    |                 | <0.001     |                     |                | <0.001     |
| ≤10                                | 179,259    | 22,170 (60.17) | 126,604 (50.61)    | 30,485 (38.31)  |            | 172,956 (48.62)     | 6303 (58.10)   |            |
| 11-12                              | 44,287     | 4091 (11.10)   | 29,589 (11.83)     | 10,607 (13.33)  |            | 43,077 (12.11)      | 1210 (11.15)   |            |
| >12                                | 143,024    | 10,586 (28.73) | 93,948 (37.56)     | 38,490 (48.37)  |            | 139,688 (39.27)     | 3336 (30.75)   |            |
| <b>Income level (£)</b>            |            |                |                    |                 | <0.001     |                     |                | <0.001     |
| Less than 18,000                   | 80,086     | 10,760 (29.20) | 56,411 (22.55)     | 12,915 (16.23)  |            | 75,014 (21.09)      | 5072 (46.75)   |            |
| 18,000 to 30,999                   | 89,363     | 9407 (25.53)   | 62,966 (25.17)     | 16,990 (21.35)  |            | 86,818 (24.41)      | 2545 (23.46)   |            |
| 31,000 to 51,999                   | 96,023     | 8750 (23.75)   | 65,447 (26.16)     | 21,826 (27.43)  |            | 94,225 (26.49)      | 1798 (16.57)   |            |
| Greater than 52,000                | 101,098    | 7930 (21.52)   | 65,317 (26.11)     | 27,851 (35.00)  |            | 99,664 (28.02)      | 1434 (13.22)   |            |
| <b>Alcohol status</b>              |            |                |                    |                 | <0.001     |                     |                | <0.001     |
| Never                              | 14,072     | 1270 (3.45)    | 9414 (3.76)        | 3388 (4.26)     |            | 13,406 (3.77)       | 666 (6.14)     |            |
| Previous                           | 12,344     | 1822 (4.94)    | 8226 (3.29)        | 2296 (2.89)     |            | 11,392 (3.20)       | 952 (8.78)     |            |
| Current                            | 340,154    | 33,755 (91.61) | 232,501 (92.95)    | 73,898 (92.86)  |            | 330,923 (93.03)     | 9231 (85.09)   |            |
| <b>Hospital Frailty Risk Score</b> |            |                |                    |                 | <0.001     |                     |                | <0.001     |
| Low                                | 289,190    | 24,931 (67.66) | 195,523 (78.17)    | 68,736 (86.37)  |            | 281,803 (79.22)     | 7387 (68.09)   |            |
| Intermediate                       | 58,643     | 8203 (22.26)   | 41,598 (16.63)     | 8842 (11.11)    |            | 56,323 (15.83)      | 2320 (21.38)   |            |
| High                               | 18,737     | 3713 (10.08)   | 13,020 (5.21)      | 2004 (2.52)     |            | 17,595 (4.95)       | 1142 (10.53)   |            |

Abbreviations: N, number of participants; SD, standard deviation. \* Calculated by using the t-test or chi-square test.
